# Supplementary material for: Defining Coordinated Care for People with Rare Conditions: A Scoping Review
Source: PubMed Central journal article supplement (PMC7319081; doi:10.5334/ijic.5464), 2020-06-25
Supplement: ijic-20-2-5464-s6.pdf [file ijic-20-2-5464-s6.pdf]

## Supplementary file 6. Themes, sub-themes, components and type of components identified from reviews

| Theme                                                             | Sub-theme<br>(n=number of reviews, %)                                    | Components (n=number of reviews, %)                                                                                                                                                                          | Type of component |      |                    |
|-------------------------------------------------------------------|--------------------------------------------------------------------------|--------------------------------------------------------------------------------------------------------------------------------------------------------------------------------------------------------------|-------------------|------|--------------------|
|                                                                   |                                                                          |                                                                                                                                                                                                              | What?             | How? | Contextual factors |
| 1. Care pathway (including analysis and decision-making)          | Assessment of patient and carer (n=100, 64.9%)                           | • Physical and mental health status (n=58, 37.7%)                                                                                                                                                            | X                 |      |                    |
|                                                                   |                                                                          | • Assessment of personal factors (e.g., Challenges, knowledge, patient understanding, preferences, goals, support, barriers, risk, activities of daily living, motivation and self-management) (n=35, 22.7%) | X                 | *    |                    |
|                                                                   |                                                                          | • Screening (physical and mental health) (n=31, 20.1%)                                                                                                                                                       | X                 |      |                    |
| • Needs (physical and mental health, neighbourhood) (n=27, 17.5%) |                                                                          | X                                                                                                                                                                                                            | X                 |      |                    |
| • Environment (e.g. work, home, social situation) (n=22, 14.3%)   |                                                                          | X                                                                                                                                                                                                            |                   |      |                    |
| • Medication and medication adherence (n=22, 14.3%)               |                                                                          | X                                                                                                                                                                                                            |                   |      |                    |
| • Resources (n=6, 3.9%)                                           |                                                                          | X                                                                                                                                                                                                            |                   |      |                    |
| • Process and outcome measurements (n=6, 3.9%)                    |                                                                          | X                                                                                                                                                                                                            |                   |      |                    |
| • Discharge assessment (n=5, 3.3%)                                |                                                                          | X                                                                                                                                                                                                            |                   |      |                    |
| • Readiness to engage (n=4, 2.6%)                                 |                                                                          | X                                                                                                                                                                                                            |                   |      |                    |
| • Readiness to transfer (n=4, 2.6%)                               |                                                                          |                                                                                                                                                                                                              |                   |      | X                  |
| • Self-assessment (n=3, 2.0%)                                     |                                                                          | X                                                                                                                                                                                                            |                   |      |                    |
| • Caregiver wellbeing, capabilities, support (n=3, 2.0%)          |                                                                          | X                                                                                                                                                                                                            |                   |      |                    |
| • Diagnostic testing (n=3, 2.0%)                                  |                                                                          | X                                                                                                                                                                                                            |                   |      |                    |
| • Behavioural evaluation (n=1, 0.7%)                              |                                                                          | X                                                                                                                                                                                                            |                   |      |                    |
| • Eligibility (n=1, 0.7%)                                         |                                                                          | X                                                                                                                                                                                                            |                   |      |                    |
| Planning (n=111, 72.1%)                                           |                                                                          | • Development of care plan/treatment plan, medication plan, maintenance plan, relapse prevention plan, follow up plan, discharge plan, action plan, self-management plan (n=95, 61.7%)                       | X                 | X    |                    |
|                                                                   | • Joint goal-setting/Goal-setting / shared decision making (n=50, 32.5%) | X                                                                                                                                                                                                            | X                 |      |                    |
|                                                                   | • Agreeing care with patient/carer (n=20, 13.0%)                         | X                                                                                                                                                                                                            | X                 |      |                    |
|                                                                   | • Planning who is responsible for which aspects of care (n=18, 11.7%)    |                                                                                                                                                                                                              | X                 |      |                    |
|                                                                   | • Preparation (n=10, 6.5%)                                               |                                                                                                                                                                                                              | X                 |      |                    |
|                                                                   | • Condition specific passport (n=5, 3.3%)                                | X                                                                                                                                                                                                            | X                 |      |                    |
|                                                                   | • Care contract between provider and patient (n=1, 0.7%)                 | X                                                                                                                                                                                                            | X                 |      |                    |
|                                                                   | • Financial planning (n=1, 0.7%)                                         | X                                                                                                                                                                                                            | X                 |      |                    |
|                                                                   | Review and evaluation (n=95, 61.7%)                                      | • Monitoring (including reviewing/progress with care plan, symptoms, progress, performance, treatment, adherence, watchful waiting and outcomes and tele monitoring) (n=79, 51.3%)                           | X                 | X    |                    |
|                                                                   |                                                                          | • Identifying and/or addressing problems/problem solving/relapse prevention (n=38, 24.7%)                                                                                                                    | X                 | X    |                    |
| • Medication review (n=28, 18.2%)                                 |                                                                          | X                                                                                                                                                                                                            |                   |      |                    |
| • Self-monitoring of behaviours/outcomes (n=24, 15.6%)            |                                                                          | X                                                                                                                                                                                                            |                   |      |                    |

|               |                                        |                                                                                                                                             |   |   |   |
|---------------|----------------------------------------|---------------------------------------------------------------------------------------------------------------------------------------------|---|---|---|
|               |                                        | • Amending plan, care or goal to overcome difficulties (n=21, 13.6%)                                                                        | X | X |   |
|               |                                        | • Evaluation (n=18, 11.7%)                                                                                                                  | X | X |   |
|               |                                        | • Clinical review/monitoring (n=11, 7.1%)                                                                                                   | X |   |   |
|               | Feedback (n=48, 31.2%)                 | • Feedback for healthcare provider (n=28, 18.2%)                                                                                            | X | X |   |
|               |                                        | • Feedback (non-specific) (includes benchmarking) (n=18, 11.7%)                                                                             | X |   |   |
|               |                                        | • Feedback to patients (n=9, 5.8%)                                                                                                          | X |   |   |
|               |                                        | • Feedback from patients/carers about care (n=9, 5.8%)                                                                                      | X | X |   |
|               |                                        | • Feedback from healthcare providers (n=4, 2.6%)                                                                                            | X | X |   |
|               |                                        | • Management of patient complaints (n=1, 0.7%)                                                                                              | X |   |   |
|               |                                        | • Biofeedback (n=1, 0.7%)                                                                                                                   | X |   |   |
|               | Follow up (n=91, 59.1%)                | • Follow up (e.g. conducted over telephone/face to face/web/mailing) (n=81, 52.6%)                                                          | X |   |   |
|               |                                        | • Post discharge follow up (n=31, 20.1%)                                                                                                    | X |   |   |
|               |                                        | • Follow up arranged with patient (n=15, 9.7%)                                                                                              | X |   |   |
|               |                                        | • Structured/systematic follow up/used register to follow up (n=13, 8.4%)                                                                   | X |   |   |
|               |                                        | • Pharmacotherapy /medication follow up (n=2, 1.3%)                                                                                         | X |   |   |
|               |                                        | • No formal follow up (n=1, 0.7%)                                                                                                           | X |   |   |
|               |                                        | • Follow up of test results (n=1, 0.7%)                                                                                                     | X |   |   |
|               | Administration (n=62, 40.3%)           | • Reminders (n=41, 26.6%)                                                                                                                   | X |   |   |
|               |                                        | • Documentation / record keeping / reports (n=29, 18.8%)                                                                                    | X | X |   |
|               |                                        | • Appointment scheduling (n=24, 15.6%)                                                                                                      | X | X |   |
|               |                                        | • Administrative support (n=7, 4.6%)                                                                                                        | X | X |   |
|               |                                        | • Client consent (n=1, 0.7%)                                                                                                                |   |   | X |
|               |                                        | • Technological difficulties / safeguarding support (n=1, 0.7%)                                                                             | X |   |   |
| 2. Approaches | Methods of coordination (n=149, 96.8%) | • Team approach (e.g. multi/interdisciplinary) (n=118, 76.6%)                                                                               |   |   | X |
|               |                                        | • Coordination/collaboration/case management/disease management/integrated approach (n=109, 70.8%)                                          |   |   | X |
|               |                                        | • Responsibility of coordination by one person (e.g. coordinator/care managers/care led by one provider or set of providers) (n=109, 70.8%) |   |   | X |
|               |                                        | • Communication between providers, other providers and/or patients (n=88, 57.1%)                                                            |   |   | X |
|               |                                        | • Using and sharing documentation /info (e.g. patient records/notes/medical summary) (n=72, 46.8%)                                          |   |   | X |
|               |                                        | • Single visit approach (including colocation, specific clinics and medical homes) (n=62, 40.3%)                                            |   |   | X |
|               |                                        | • Referral systems (n=57, 37.0%)                                                                                                            |   |   | X |
|               |                                        | • Meetings to bring team together to discuss coordination (n=48, 31.2%)                                                                     |   |   | X |
|               |                                        | • Transition (n=41, 26.6%)                                                                                                                  |   |   | X |
|               |                                        | • Task sharing/delegation/shared care (n=29, 18.8%)                                                                                         |   |   | X |
|               |                                        | • Patient/carer coordinating own treatment / patient carer involvement / patients as partners in care /patient held                         |   |   | X |

|            |                                                                    |                                                                                                                                                                                                                                                 |   |   |
|------------|--------------------------------------------------------------------|-------------------------------------------------------------------------------------------------------------------------------------------------------------------------------------------------------------------------------------------------|---|---|
|            |                                                                    | records (n=26, 16.9%)                                                                                                                                                                                                                           |   |   |
|            |                                                                    | • Continuity of care (n=23, 14.9%)                                                                                                                                                                                                              |   | X |
|            |                                                                    | • Joint clinics/consultation (n=23, 14.9%)                                                                                                                                                                                                      |   | X |
|            |                                                                    | • Alternating appointments/visits (n=5, 3.3%)                                                                                                                                                                                                   |   | X |
|            |                                                                    | • Professional communities or practices (n=4, 2.6%)                                                                                                                                                                                             |   | X |
|            |                                                                    | • None/lack of coordination (n=3, 2.0%)                                                                                                                                                                                                         |   | X |
|            | Expert care<br>(n=97, 63.0%)                                       | • Specialist care/specialist teams/expert knowledge/condition specific expertise/specialist referrals/expert review of guidelines (n=89, 57.8%)                                                                                                 | X |   |
|            |                                                                    | • Specialist clinics /condition-specific clinics (n=35, 22.7%)                                                                                                                                                                                  |   | X |
|            |                                                                    | • Patient and family expertise (n=2, 1.3%)                                                                                                                                                                                                      | X |   |
|            |                                                                    | • Lack of expertise (n=1, 0.7%)                                                                                                                                                                                                                 | X |   |
|            | Technology<br>(n=93, 60.4%)                                        | • Telecare (including Telehealth/home based monitoring system /use of monitoring equipment or technological aids, telemedicine/electronic prescriptions/tele psychiatry) (patients/carers) (n=37, 24.0%)                                        | X | X |
|            |                                                                    | • Algorithms/decision support aids for HCPs (n=35, 22.7%)                                                                                                                                                                                       |   | X |
|            |                                                                    | • Communication systems/ teleconferencing (HCPs) (n=35, 22.7%)                                                                                                                                                                                  |   | X |
|            |                                                                    | • Electronic medical records/personal health records/continuity of care records (n=34, 22.1%)                                                                                                                                                   |   | X |
|            |                                                                    | • Clinical information systems (HCPs) (e.g. patient tracking etc.) (n=32, 20.8%)                                                                                                                                                                |   | X |
|            |                                                                    | • Reminders/recall and alert system (HCPs) (n=31, 20.1%)                                                                                                                                                                                        | X | X |
|            |                                                                    | • Centralised database of patients/registry (HCPs) (n=28, 18.2%)                                                                                                                                                                                |   | X |
|            |                                                                    | • Automated performance monitoring (HCPs) / feedback systems (n=24, 15.6%)                                                                                                                                                                      | X |   |
|            |                                                                    | • Support/education using technology e.g. via online platforms (patients/carers) /e-consultations (n=24, 15.6%)                                                                                                                                 | X |   |
|            |                                                                    | • Non-specific IT (n=19, 12.3%)                                                                                                                                                                                                                 | X |   |
|            |                                                                    | • Use of online platform (HCPs) (e.g. online learning/general IT/websites/IT platforms/shared IT platforms /computerised lab records) (n=18, 11.7%)                                                                                             | X | X |
|            |                                                                    | • Electronic appointment reminders (patients/carers) (n=11, 7.1%)                                                                                                                                                                               | X | X |
|            |                                                                    | • Automated summaries and reports and other materials (HCPs) (n=10, 6.5%)                                                                                                                                                                       |   | X |
|            |                                                                    | • Delivery of questionnaires (HCPs, patients, carers) (n=6, 3.9%)                                                                                                                                                                               | X |   |
|            |                                                                    | • Technological support (n=4, 2.6%)                                                                                                                                                                                                             | X |   |
|            |                                                                    | • Use of other digital tools e.g. digital camera (n=1, 0.7%)                                                                                                                                                                                    | X |   |
| 3. Support | Support<br>provided to<br>patients and<br>carers (n=144,<br>93.5%) | • Education and information for patients / skills training (understanding condition and management, transition; honest, open and age appropriate; available services; support transition; communication skills) (n=113, 73.4%)                  | X | X |
|            |                                                                    | • General support for patients (including social support, practical support, non-specific support, general support for transition, and support from different modalities, e.g. face to face / letter / phone /email/newsletters) (n=105, 68.2%) | X | X |
|            |                                                                    | • Self-management support (n=84, 54.6%)                                                                                                                                                                                                         | X | X |

|             |                                                             |                                                                                                                                                              |   |   |   |
|-------------|-------------------------------------------------------------|--------------------------------------------------------------------------------------------------------------------------------------------------------------|---|---|---|
|             |                                                             | • Psychological support (e.g. counselling/CBT/MI, emotional support, behavioural therapy) (n=77, 50%)                                                        | X |   |   |
|             |                                                             | • Medical treatment (including support for medication, medical treatment, surgery) (n=73, 47.4%)                                                             | X |   |   |
|             |                                                             | • Home visits (n=62, 40.3%)                                                                                                                                  | X | X |   |
|             |                                                             | • Physical health support (e.g. Diet, exercise, smoking cessation, health promotion) (n=54, 35.1%)                                                           | X |   |   |
|             |                                                             | • Involvement of social workers/other community personnel (including volunteers) (n=54, 35.1%)                                                               | X | X |   |
|             |                                                             | • Signposting/linking to community resources/ community based referrals/community based care (n=51, 33.1%)                                                   | X | X |   |
|             |                                                             | • Support for carers, including education and information (e.g. (how they can support their child, information about coordination, sectors) (n=40, 26.0%)    | X | X |   |
|             |                                                             | • Information about /support for accessing services/resources or using healthcare aspects e.g. records (n=25, 16.2%)                                         | X | X |   |
|             |                                                             | • Support from pharmacist (n=25, 16.2%)                                                                                                                      | X | X |   |
|             |                                                             | • Peer mentoring/involvement of peers/mentor programs/peer support/peer educators (n=24, 15.6%)                                                              | X |   |   |
|             |                                                             | • Opportunities to become familiar with coordinated approach (E.g. visits, tours, lunch, joint visits) (n=15, 9.7%)                                          |   |   | X |
|             |                                                             | • Family support / involvement (n=11, 7.1%)                                                                                                                  | X | X |   |
|             |                                                             | • Palliative care support (n=7, 4.6%)                                                                                                                        | X |   |   |
|             |                                                             | • Support with other aspects of care e.g. Social welfare benefits/legal services/finances, housing (n=6, 3.9%)                                               | X |   |   |
|             |                                                             | • Consultations out of clinic (n=3, %)                                                                                                                       | X | X |   |
|             |                                                             | • Social networking (n=2, 1.3%)                                                                                                                              | X |   |   |
|             |                                                             | • Genetic counselling (n=1, 0.7%)                                                                                                                            | X |   |   |
|             | Support provided to health care professionals (n=85, 55.2%) | • Education (including summer camps) (n=50, 32.5%)                                                                                                           | X | X |   |
|             |                                                             | • Training (n=48, 31.2%)                                                                                                                                     | X | X |   |
|             |                                                             | • Supervision/support (n=47, 30.5%)                                                                                                                          |   |   | X |
|             |                                                             | • Support tools (n=10, 6.5%)                                                                                                                                 | X | X |   |
|             |                                                             | • Non-specific interventions (n=6, 3.9%)                                                                                                                     | X | X |   |
|             |                                                             | • Administrative / technical support (n=5, 3.3%)                                                                                                             | X | X |   |
|             |                                                             | • Behaviour plans (n=1, 0.7%)                                                                                                                                |   |   | X |
|             |                                                             | • Capacity building (n=1, 0.7%)                                                                                                                              | X | X |   |
| 4. Features | Individual differences (n=69, 44.8%)                        | • Individualised care/care plans / patient centred care (n=51, 33.1%)                                                                                        |   |   | X |
|             |                                                             | • Taking into account culture, health, demographic factors (e.g. age or gender), readiness to transition, goals and expectations, independence (n=35, 22.7%) |   |   | X |
|             |                                                             | • Flexible (Healthcare/timing) (n=12, 7.8%)                                                                                                                  |   |   | X |
|             | Evidence-based practice (n=100, 64.9%)                      | • Guideline based treatment (n=57, 37.0%)                                                                                                                    |   |   | X |
|             |                                                             | • Evidence-based standardised treatment protocols (n=54, 35.1%)                                                                                              |   |   | X |
|             |                                                             | • Standardised /structured care (including use of manual, checklists/competency frameworks/criteria) (n=30, 19.5%)                                           |   |   | X |
|             |                                                             | • Evidence-based pathways/evidence based care/evidence-based screening (n=28, 18.2%)                                                                         |   |   | X |
|             |                                                             | • Treatment algorithms (n=22, 14.3%)                                                                                                                         |   |   | X |

|                      |                                      |                                                                                                                                                         |  |  |  |   |  |   |   |
|----------------------|--------------------------------------|---------------------------------------------------------------------------------------------------------------------------------------------------------|--|--|--|---|--|---|---|
|                      |                                      | • Evidence-based tools (n=8, 5.2%)                                                                                                                      |  |  |  |   |  |   | X |
|                      |                                      | • Best practice/previous treatments/recommendations (n=8, 5.2%)                                                                                         |  |  |  |   |  |   | X |
|                      |                                      | • Policy/policy template (n=7, 4.6%)                                                                                                                    |  |  |  |   |  |   | X |
|                      |                                      | • Unstructured/non guideline based care (n=1, 0.7%)                                                                                                     |  |  |  |   |  |   | X |
|                      |                                      | • Treatment targets (n=1, 0.7%)                                                                                                                         |  |  |  |   |  |   | X |
|                      | Other (n=31, 20.1%)                  | • Qualified staff (n=11, 7.1%)                                                                                                                          |  |  |  |   |  |   | X |
|                      |                                      | • Length of intervention (n=9, 5.8%)                                                                                                                    |  |  |  |   |  |   | X |
|                      |                                      | • Amount of contact (n=3, 2.0%)                                                                                                                         |  |  |  |   |  |   | X |
|                      |                                      | • Interested/willing providers (n=3, 2.0%)                                                                                                              |  |  |  |   |  |   | X |
|                      |                                      | • Type of coordination (n=2, 1.3%)                                                                                                                      |  |  |  |   |  |   | X |
|                      |                                      | • Characteristics of staff (n=2, 1.3%)                                                                                                                  |  |  |  |   |  |   | X |
| 5. Wider environment | Healthcare environment (n=87, 56.5%) | • Supportive environment for coordination (e.g. distance from treatment facilities/access to care) (n=48, 31.2%)                                        |  |  |  |   |  |   | X |
|                      |                                      | • Resources (e.g. expertise, staffing, resources) (n=33, 21.4%)                                                                                         |  |  |  |   |  |   | X |
|                      |                                      | • Quality improvement/evaluation of services (n=31, 20.1%)                                                                                              |  |  |  | X |  |   |   |
|                      |                                      | • Financial incentives (including providers, institution and patients) (n=27, 17.5%)                                                                    |  |  |  |   |  | X |   |
|                      |                                      | • Organisation of healthcare system (including service planning...) (n=26, 16.9%)                                                                       |  |  |  |   |  | X |   |
|                      |                                      | • Structural changes (n=25, 16.2%)                                                                                                                      |  |  |  |   |  | X |   |
|                      |                                      | • Organisational support (including support from organisation and agreements/discussions between organisations and professional networks) (n=25, 16.2%) |  |  |  |   |  |   | X |
|                      |                                      | • Outreach (n=17, 11.0%)                                                                                                                                |  |  |  | X |  |   |   |
|                      |                                      | • Governance (n=9, 5.8%)                                                                                                                                |  |  |  | X |  | X |   |
|                      |                                      | • Identification of barriers to care/assessment of need (n=8, 5.2%)                                                                                     |  |  |  | X |  |   |   |
|                      |                                      | • Use of existing services (n=2, 1.3%)                                                                                                                  |  |  |  | X |  |   |   |
|                      |                                      | • Lack of supportive environment (n=1, 0.7%)                                                                                                            |  |  |  | X |  |   |   |
|                      | Wider environment (n=15, 9.7%)       | • National policy changes (n=9, 5.8%)                                                                                                                   |  |  |  |   |  |   | X |
|                      |                                      | • Campaigns (n=5, 3.3%)                                                                                                                                 |  |  |  |   |  |   | X |
|                      |                                      | • Funding collaborations/changes to funding (n=2, 1.3%)                                                                                                 |  |  |  |   |  |   | X |
|                      |                                      | • Geographical coverages and rostering (n=2, 1.3%)                                                                                                      |  |  |  |   |  |   | X |

Note: Those components that fall into both what and how have been identified with an 'x' in both columns. This table provides a summary of the components that make up coordinated care.

\* One study (McDonald et al, 2007) highlights assessment can be used to identify coordination challenges
